# Supplementary material
Source: Springer Nature journal article supplement (https://www.springermedizin.de/resource/supplementary/12879_2012_2418_MOESM5_ESM.pdf/9444534)

## Arithmetic 2

Relative Fluorescence

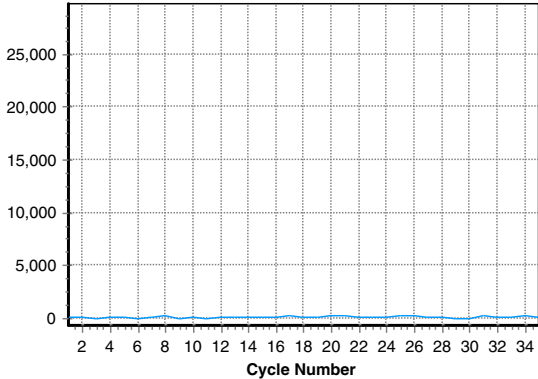

Supplement: MOESM5 [file 9444534]
